# Supplementary material
Source: publisher figshare collection journal article supplement (https://acs.figshare.com/ndownloader/files/14639882)
Supplement: Supplementary file 1 [file 14639882]

**Supporting information of “Material Design of  
Green-Light-Emitting Semiconductors: Perovskite-Type  
Sulfide SrHfS<sub>3</sub>”**

Kota Hanzawa,<sup>1</sup> Soshi Iimura,<sup>1</sup> Hidenori Hiramatsu,<sup>1,2,\*</sup> and Hideo Hosono<sup>1,2</sup>

<sup>1</sup>Laboratory for Materials and Structures, Institute of Innovative Research, Tokyo  
Institute of Technology, Mailbox R3-3, 4259 Nagatsuta-cho, Midori-ku, Yokohama  
226-8503, Japan

<sup>2</sup>Materials Research Center for Element Strategy, Tokyo Institute of Technology,  
Mailbox SE-1, 4259 Nagatsuta-cho, Midori-ku, Yokohama 226-8503, Japan

Correspondence and requests for materials should be addressed to H. Hiramatsu.

\*H. Hiramatsu, e-mail: h-hirama@mces.titech.ac.jp

**Text S1.**

The  $Pnma$  superstructure has a  $\sqrt{2} \times \sqrt{2}$  times larger  $ac$ -plane and 2 times longer  $b$ -axis compared with the  $Pm\bar{3}m$  structure. The structural transformation in the  $ac$ -plane is illustrated in **Fig. S1(a)** and the corresponding reciprocal lattice folding is shown in (b). In real space, the primitive cubic lattice (black) has a lattice translation vector  $\mathbf{T}_{2D} = u_1\mathbf{a} + u_3\mathbf{c}$ , where  $\mathbf{a}$  and  $\mathbf{c}$  are primitive translation vectors, and  $u_1$  and  $u_3$  are integers. Through the change of the unit cell size (orange), each primitive translation vector rotates  $45^\circ$  in the  $ac$ -plane and becomes  $\sqrt{2}$  times longer. As a result, the lattice translation vector changes to  $\mathbf{T}'_{2D} = u'_1\mathbf{a}' + u'_3\mathbf{c}'$ , where  $\mathbf{a}' = \mathbf{a} + \mathbf{c}$ ,  $\mathbf{c}' = -\mathbf{a} + \mathbf{c}$ , and  $u'_1$  and  $u'_3$  are integers. In reciprocal space, the reciprocal lattice vector is denoted as  $\mathbf{G}_{2D} = v_1\mathbf{x} + v_3\mathbf{z}$ , where  $\mathbf{x}$  and  $\mathbf{z}$  are primitive reciprocal lattice vectors, and  $v_1$  and  $v_3$  are integers. Reflecting the unit cell size change in real space, each primitive reciprocal lattice vector also rotates  $45^\circ$  in the  $ac$ -plane and becomes  $1/\sqrt{2}$  times shorter (blue). This changes  $\mathbf{G}_{2D}$  to  $\mathbf{G}'_{2D} = v'_1\mathbf{x}' + v'_3\mathbf{z}'$ , where  $\mathbf{x}' = (\mathbf{x} + \mathbf{z})/2$ ,  $\mathbf{z}' = (-\mathbf{x} + \mathbf{z})/2$ , and  $v'_1$  and  $v'_3$  are integers. Because of the shortening of the reciprocal lattice vector, some bands are left outside the first BZ defined by the  $\mathbf{x}$  and  $\mathbf{z}$ . Consequently, those bands have to be folded along the  $\mathbf{G}'_{2D}$  to the first BZ defined by the  $\mathbf{x}'$  and  $\mathbf{z}'$ , and the number of bands becomes double. This indicates that bands at the R point are folded to the Y point. This unit cell transformation in real space corresponds to structural transformation from  $Pm\bar{3}m$  to  $P4/mbm$ .

Next, we consider the structural transformation to  $Pnma$  along the  $b$ -axis. In real space, the  $b$ -axis of  $Pnma$  is 2 times longer than before the structural transformation, as shown in (c, green). The lattice translation vector  $\mathbf{T} = u'_1\mathbf{a}' + u_2\mathbf{b} + u'_3\mathbf{c}'$  changes to  $\mathbf{T}'$

$= u'_1 \mathbf{a}' + u'_2 \mathbf{b}' + u'_3 \mathbf{c}'$ , where  $\mathbf{b}$  and  $\mathbf{b}'$  are primitive lattice translation vectors before and after the structural transformation ( $\mathbf{b}' = 2\mathbf{b}$ ), and  $u_2$  and  $u'_2$  are integers. The corresponding BZ size becomes half, as displayed in (d, red). The reciprocal lattice vector  $\mathbf{G} = n'_1 \mathbf{x}' + n_2 \mathbf{y} + n'_3 \mathbf{z}'$  changes to  $\mathbf{G}' = n'_1 \mathbf{x}' + n'_2 \mathbf{y}' + n'_3 \mathbf{z}'$ , where  $\mathbf{y}$  and  $\mathbf{y}'$  are primitive lattice translation vectors before and after the structural transformation ( $\mathbf{y}' = \mathbf{y}/2$ ), and  $n_2$  and  $n'_2$  are integers. This represents that bands at the Y point are folded to the  $\Gamma$  point through a translation operation in reciprocal space. In the inset in (e), BZ of  $Pm\bar{3}m$  is shown. Here, blue and red arrows represent how the VBM at the R point transfers to the  $\Gamma$  point through the structural transformations in the  $ac$ -plane and along the  $b$ -axis. The resultant band folding is shown in (e). The VBM at the R point is folded first to the Y point, and finally to the  $\Gamma$  point.

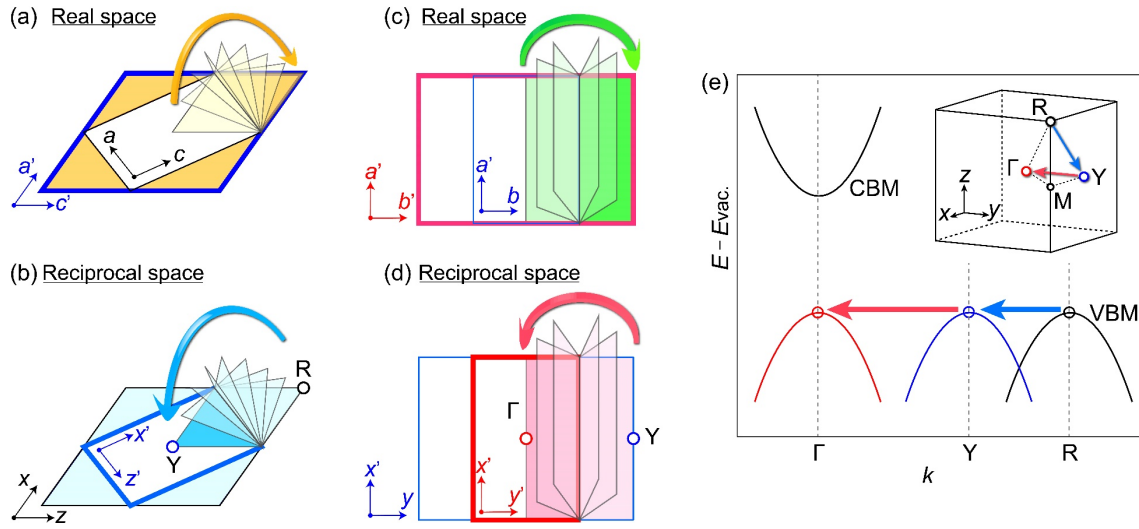

**Figure S1.** Band folding through structural transformation in perovskite from cubic  $Pm\bar{3}m$  to orthorhombic  $Pnma$ .

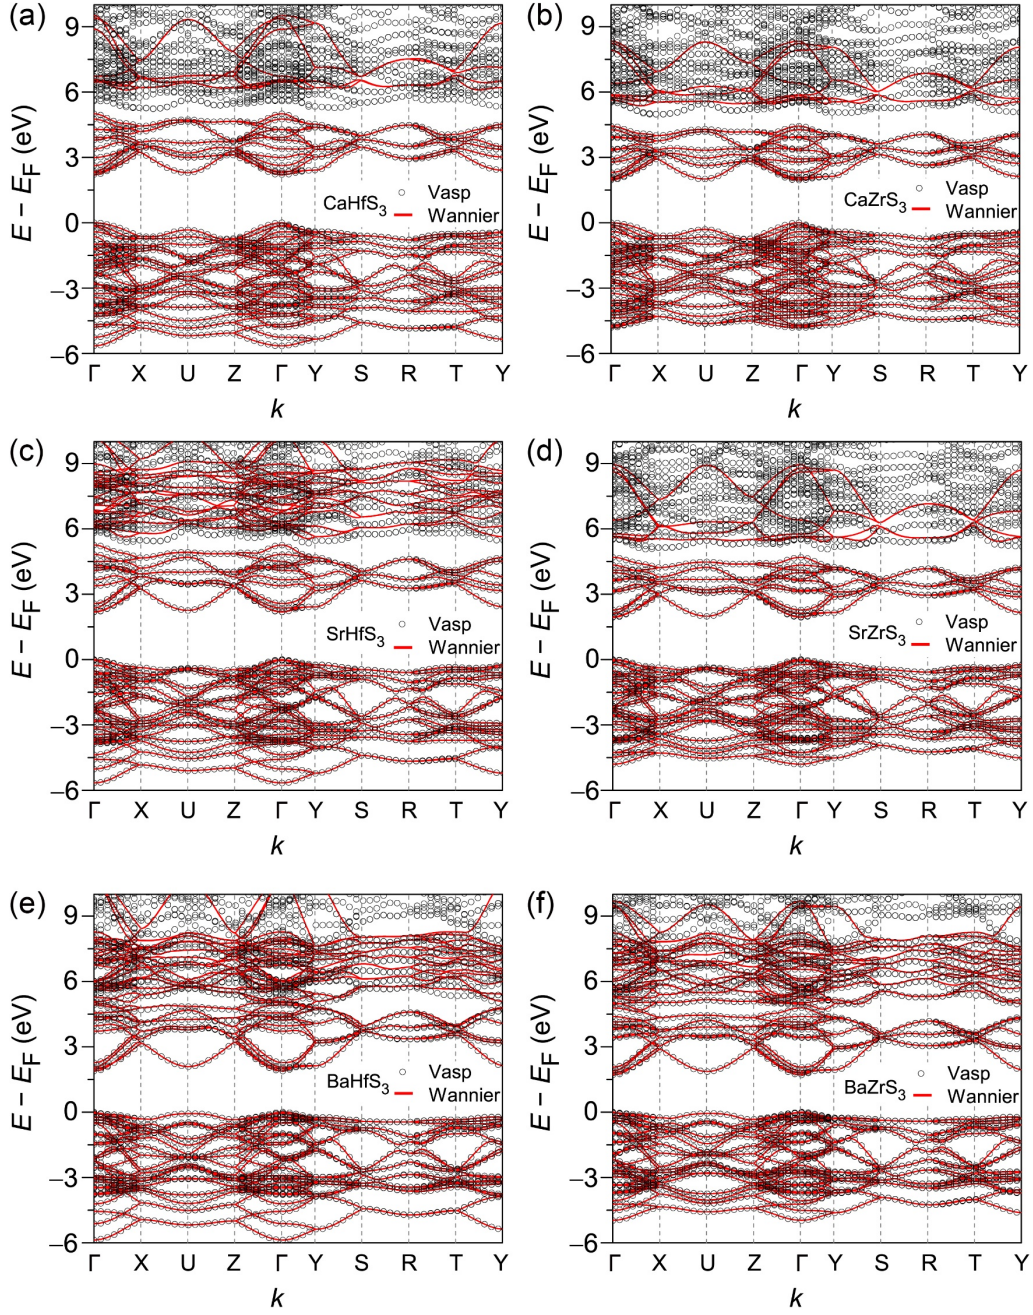

**Figure S2.** Band structures of  $AE-eTM-S_3$ . **S2a**, **S2c**, and **S2e** denote those of  $AE-HfS_3$ , where  $AE = Ca, Sr$  and  $Ba$ , respectively; whereas **S2b**, **S2d**, and **S2f** correspond to  $AE-ZrS_3$  ( $AE = Ca, Sr$ , and  $Ba$ , respectively). Black circles are results of band structure calculations of  $AE-eTM-S_3$  using VASP code, while red lines are computed using Wannier interpolation.

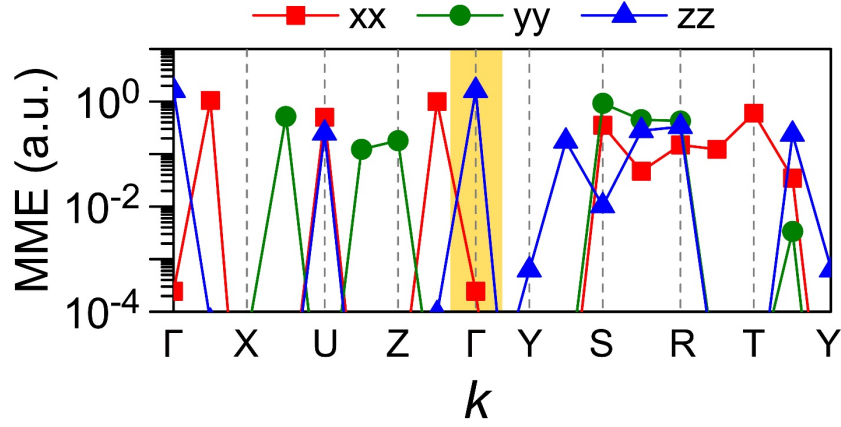

**Figure S3.** Calculated momentum matrix elements (MME) from the valence band edge to conduction band edge of SrHfS<sub>3</sub> at each  $k$  point.

**Table S1.** Calculated effective masses and band gaps of *AE-eTM-S*<sub>3</sub>.

|                    | $m_e^* (m_0)$ |             |             | $m_h^* (m_0)$ |             |             | $E_g$ (eV) |
|--------------------|---------------|-------------|-------------|---------------|-------------|-------------|------------|
|                    | $\Gamma$ -X   | $\Gamma$ -Y | $\Gamma$ -Z | $\Gamma$ -X   | $\Gamma$ -Y | $\Gamma$ -Z |            |
| CaHfS <sub>3</sub> | 0.30          | 0.51        | 0.46        | 0.78          | 0.18        | 0.62        | 2.21       |
| SrHfS <sub>3</sub> | 0.40          | 0.26        | 0.43        | 0.70          | 0.19        | 0.61        | 2.18       |
| BaHfS <sub>3</sub> | 0.31          | 0.19        | 0.39        | 0.19          | 0.69        | 0.56        | 1.90       |
| CaZrS <sub>3</sub> | 0.31          | 0.60        | 0.48        | 0.85          | 0.18        | 0.61        | 1.95       |
| SrZrS <sub>3</sub> | 0.41          | 0.26        | 0.44        | 0.75          | 0.19        | 0.61        | 1.94       |
| BaZrS <sub>3</sub> | 0.33          | 0.20        | 0.41        | 0.19          | 0.70        | 0.52        | 1.72       |

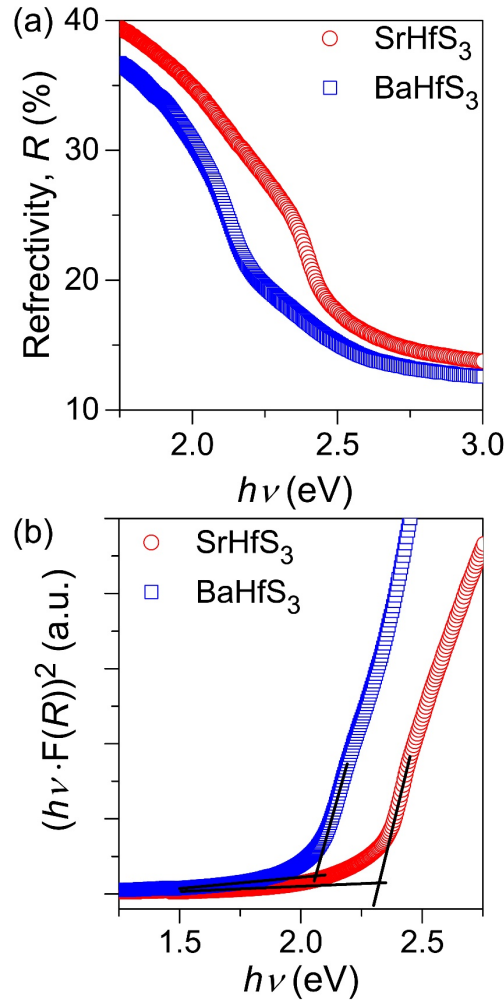

**Figure S4.** (a) Diffuse reflectance spectra and (b) the Kubelka–Munk plot of  $\text{SrHfS}_3$  (red circles) and  $\text{BaHfS}_3$  (blue squares). For the plot, we performed a transformation using the following equation;  $F(R) = (1-R)^2/2R = K/S$ , where  $K$  and  $S$  indicate optical absorption and scattering coefficients, respectively. Linear lines in (b) are results of the least-squares fittings.

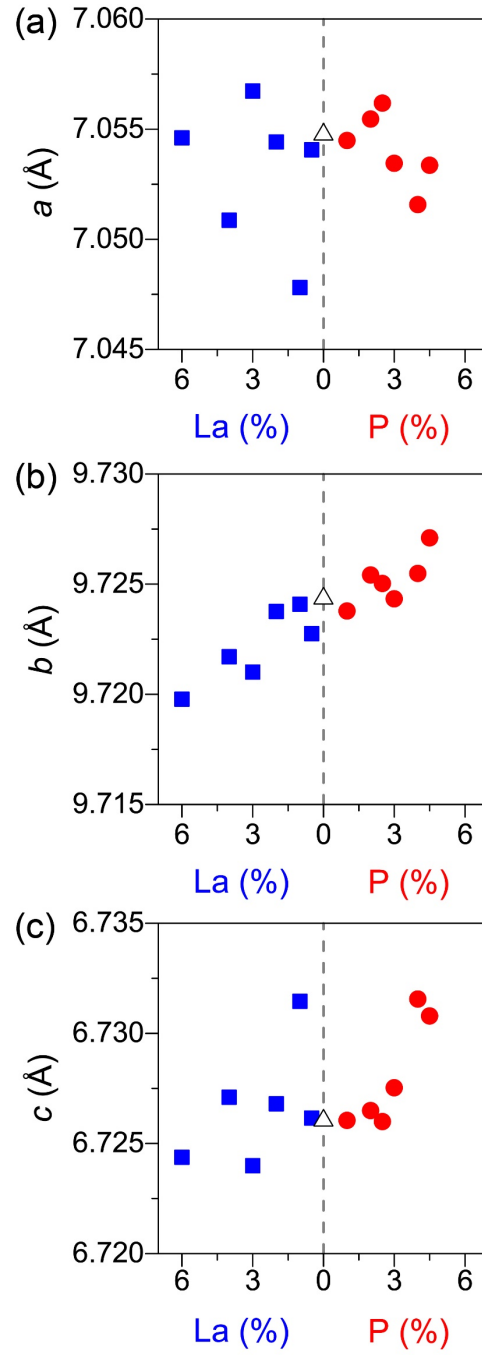

**Figure S5.** (a)  $a$ -, (b)  $b$ - and (c)  $c$ -axes lattice parameter variations in  $\text{SrHfS}_3$  through La- (blue squares) and P-dopings (red circles). The horizontal axis denotes nominal La- and P-doping concentrations.



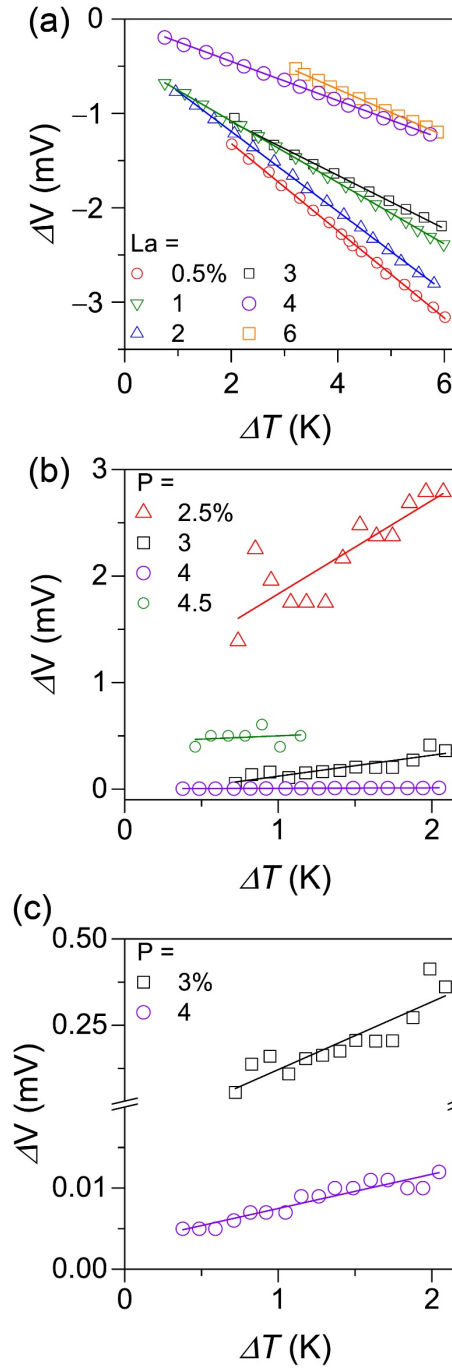

**Figure S6.** Thermopower measurement of (a) La- and (b) P-doped SrHfS<sub>3</sub> as a function of nominal doping concentrations. (c) The enlarged plots for the 3% and 4% P-doped samples shown in (b). The least-squares fitting results are delineated as straight lines.

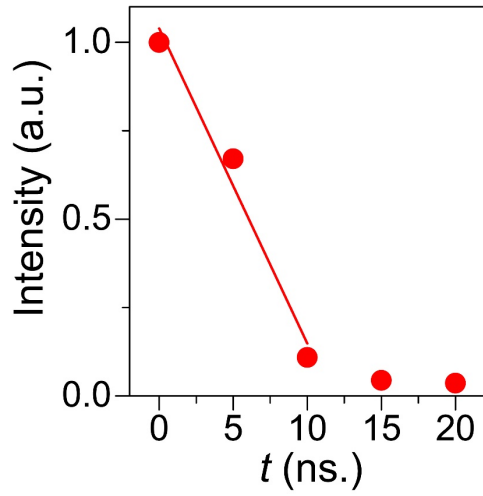

**Figure S7.** Decay curve of undoped SrHfS<sub>3</sub> at 30 K. Red line is a result of the least-squares fitting for the single-decay model emission lifetime.

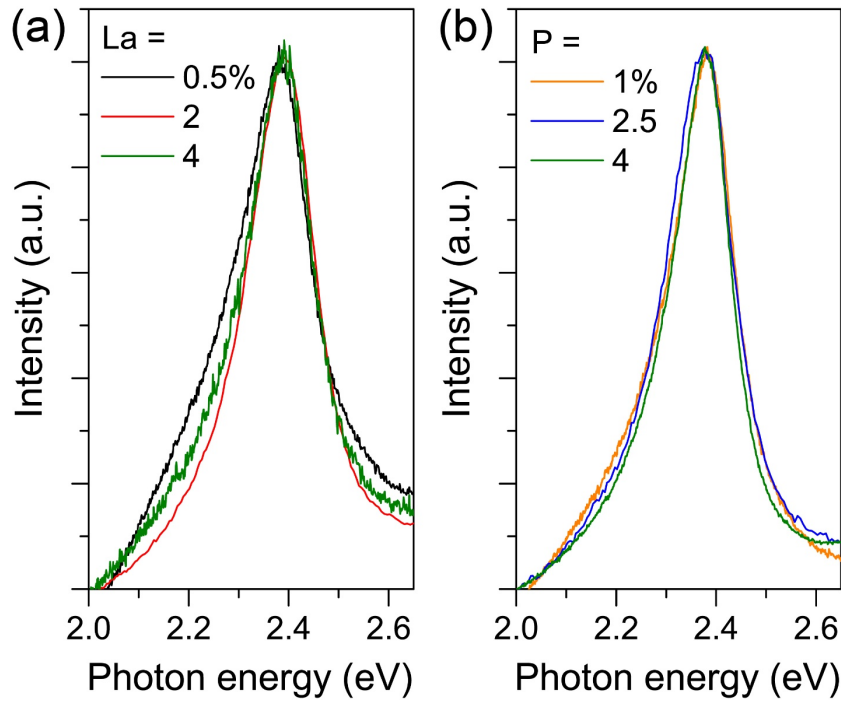

**Figure S8.** Photoluminescence (PL) spectra of (a) La- and (b) P-doped SrHfS<sub>3</sub> taken at 300 K. Black, red, and green lines in (a) correspond to PL spectra at La-doping concentrations of 0.5%, 2%, and 4%, respectively. Orange, blue, and green lines denote PL spectra of 1%, 2.5%, and 4% P-doped SrHfS<sub>3</sub>.
